# **Multifactorial Methods Integrating Haplotype and Epistasis Effects for Genomic Estimation and Prediction of Quantitative Traits**

Yang Da\*, Zuoxiang Liang, Dzianis Prakapenka  
Department of Animal Science, University of Minnesota, Saint Paul, MN 55108, USA

\* Corresponding author

E-mail addresses:

YD: [yda@umn.edu](mailto:yda@umn.edu)

ZL: [zliang@umn.edu](mailto:zliang@umn.edu)

DP: [praka032@umn.edu](mailto:praka032@umn.edu)

## 1 **ABSTRACT**

2 The rapid growth in genomic selection data provides unprecedented opportunities to discover and  
3 utilize complex genetic effects for improving phenotypes but methodology is lacking. Epistasis  
4 effects are interaction effects and haplotype effects may contain local high-order epistasis effects.  
5 Multifactorial methods with SNP, haplotype and epistasis effects up to the third-order are  
6 developed to investigate the contributions of global low-order and local high-order epistasis effects  
7 to the phenotypic variance and the accuracy of genomic prediction of quantitative traits. These  
8 methods include genomic best linear unbiased prediction (GBLUP) with associated reliability for  
9 individuals with and without phenotypic observations including a computationally efficient  
10 GBLUP method for large validation populations, and genomic restricted maximum estimation  
11 (GREML) of the variance and associated heritability using a combination of EM-REML and AI-  
12 REML iterative algorithms. These methods were developed for two models, Model-I with 10 effect  
13 types, and Model-II with 13 effect types including intra- and inter-chromosome pairwise epistasis  
14 effects that replace the pairwise epistasis effects of Model-I. GREML heritability estimate and  
15 GBLUP effect estimate for each effect of an effect type are derived except for third-order epistasis  
16 effects. The multifactorial models evaluate each effect type based on the phenotypic values  
17 adjusted for the remaining effect types and can use more effect types than separate models of SNP,  
18 haplotype and epistasis effects; and provide a methodology capability to evaluate the contributions  
19 of complex genetic effects to the phenotypic variance and prediction accuracy, and to discover and  
20 utilize complex genetic effects for improving the phenotypes of quantitative traits.

## 21 INTRODUCTION

22 Genomic estimation and prediction of quantitative traits using single nucleotide polymorphism  
23 (SNP) markers and mixed models have become a widely approach for genetic improvement in  
24 livestock and crop species. The rapid growth in genomic selection data provides unprecedented  
25 opportunities to discover and utilize complex genetic mechanism but methodology and computing  
26 tools are lacking for investigating complex genetic mechanisms using the approach of genomic  
27 estimation and prediction. The integration of global low-order epistasis effects and local high-  
28 order epistasis effects contained in haplotypes for genomic estimation and prediction is a step  
29 forward for the discovery and application of complex genetic mechanisms to improve the  
30 phenotypes of quantitative traits. The integrated model with multiple types of genetic effects can  
31 use more effect types than separate models SNP, haplotype and epistasis effects, and may provide  
32 more accurate understanding of each effect type than the separate models due to the use of  
33 phenotypic values adjusted for the genetic values of the remaining effect types in the model.

34 The theory of genetic partition of two-locus genotypic values defines four types of epistasis  
35 values, additive  $\times$  additive ( $A \times A$ ), additive  $\times$  dominance ( $A \times D$ ), dominance  $\times$  additive ( $D \times A$ ),  
36 and dominance  $\times$  dominance ( $D \times D$ ) epistasis values by Cockerham and Kempthorne [1, 2]. The  
37 Cockerham method defines each epistasis coefficient as the product of the coefficients of the two  
38 interacting effects that each can be additive or dominance [1]. This definition of epistasis  
39 coefficient is the basis for defining epistasis model matrices in terms of the model matrices of  
40 additive and dominance effects. Cockerham also defines a pedigree epistasis relationship as the  
41 product between the pedigree additive and dominance relationships [1], and this definition is the  
42 theoretical basis for Henderson's approach to express epistasis relationship matrices as the  
43 Hadamard products of the additive and dominance relationship matrices [3].

44

45 The Henderson approach of Hadamard products for epistasis relationship matrices was  
46 suggested for genomic prediction using epistasis effects by replacing the pedigree additive and  
47 dominance relationship matrices with the genomic additive and dominance relationship matrices  
48 calculated from SNP markers [4-6]. This genomic version of the Henderson's Hadamard products  
49 calculates genomic epistasis relationship matrices based on the model matrices of SNP additive  
50 and dominance effects without creating large epistasis model matrices that can be difficult or  
51 impossible to compute. For  $m$  SNPs, each pairwise (second-order) epistasis model matrix is  
52  $(m-1)/2$  times as large as the SNP additive or dominance model matrix. For 50,000 SNPs, an  
53 epistasis model matrix is nearly 25,000 times as large as the SNP additive or dominance matrix.  
54 The calculation of such a large model matrix for pairwise epistasis effects is difficult and the  
55 calculation of the model matrices for epistasis effects higher than the second-order is practically  
56 impossible for 50,000 or more SNPs. Since genomic additive and dominance relationship matrices  
57 are calculated from the SNP additive and dominance model matrices [7-10], the Hadamard  
58 products between SNP additive and dominance relationship matrices removes the computing  
59 difficulty associated with the large epistasis model matrices for calculating genomic epistasis  
60 relationship matrices. However, this genomic version of the pedigree-based epistasis relationship  
61 matrices contains intra-locus epistasis effects that is not present in the epistasis model [11]. For  
62 this reason, the genomic version of Henderson's Hadamard product could be described as  
63 approximate genomic epistasis relationship matrices (AGERM). Formulations have been  
64 developed to obtain the exact genomic epistasis relationship matrices (EGERM) by removing the  
65 intra-locus epistasis effects contained in AGERM by modifying Henderson's Hadamard products  
66 without creating the epistasis model matrices [11-14]. The difference between AGERM and  
67 EGERM tends to diminish as the number of SNPs increases [13]. A Holstein dataset with 60,671  
68 SNPs showed AGERM and EGERM had the same heritability estimates and the same accuracy of

69 predicting the phenotypic values [15] , and the swine dataset with 52,842 SNPs in this manuscript  
70 showed the two methods had similar results. However, EGERM required many times of computing  
71 time as required by AGERM. The methods in this article allow the use of either AGERM or  
72 EGERM, and our computing package of EPIHAP implements both AGERM and EGERM.  
73 Henderson's Hadamard products [3] and hence AGERM are applicable to any order of epistasis  
74 effects, and EGERM also has a general formula for any order of epistasis effects [13]. However,  
75 limited tests showed that fourth-order global epistasis virtually contributed nothing to the  
76 phenotypic variance but generated considerable computing difficulty [16], raising question about  
77 the value for global epistasis effects beyond the third-order. Methods of genomic estimation and  
78 prediction of global epistasis effects up to the third-order should have a wide-range applications,  
79 given that the number of reported epistasis effects lag far behind the number of single-point effects  
80 [17-19] even though epistasis effects are important genetic effects [20-22]. In contrast to the  
81 computing difficulty and uncertain impact of global high-order epistasis effects beyond the third-  
82 order, local high-order epistasis effects in haplotypes with many SNPs were responsible for the  
83 increased accuracy of predicting phenotypic values of certain traits. For examples, a haplotype  
84 model with 12 SNPs per haplotype block had the best prediction accuracy for low density  
85 lipoproteins in a human population [23], a haplotype model with 500 Kb haplotype blocks that on  
86 average had 105 SNPs per block had the best prediction accuracy for average daily gain in a swine  
87 population [24], and a haplotype model with 15 SNPs per haplotype block had the best prediction  
88 accuracy in a wheat study [25]. The integration of haplotype and epistasis effects provides an  
89 approach to investigate the contributions of global low-order epistasis effects and local high-order  
90 epistasis effects to the phenotypic variance and the accuracy of genomic prediction under the same  
91 model.

92 An epistasis GWAS in Holstein cattle showed that intra- and inter-chromosome epistasis  
93 effects affected different traits differently, e.g., daughter pregnancy rate was mostly affected by  
94 inter-chromosome epistasis effects whereas milk production traits were mostly affected by intra-  
95 chromosome epistasis effects [26]. Genomic heritability estimates of intra- and inter-chromosome  
96 heritabilities for daughter pregnancy rate using methods in this article showed that intra-  
97 chromosome  $A \times A$  heritability was 0.031, and inter-chromosome  $A \times A$  heritability 0.178 [15],  
98 consistent with the GWAS results of 21% intra-chromosome and 79% inter-chromosome  $A \times A$   
99 effects among the top 33,552 pairs of  $A \times A$  effects in the GWAS study [26]. Therefore, dividing  
100 pairwise epistasis effects into intra- and inter-chromosome epistasis effects for genomic prediction  
101 and estimation allows the investigation of the contributions of intra- and inter-chromosome  
102 pairwise epistasis effects to the phenotypic variance and prediction accuracy.

103 The purpose of the multifactorial model in this article is to integrate haplotype effects and  
104 epistasis effects up to the third-order for genomic estimation and prediction of quantitative traits,  
105 to provide a general and flexible methodology framework for genomic prediction and estimation  
106 using complex genetic mechanisms, and to provide methodology details of the EPIHAP computer  
107 package that implements the integration of haplotype and epistasis effects [15, 16]. The  
108 multifactorial model has the advantage of using more effect types and assessing each effect type  
109 based on the phenotypic values adjusted for all remaining effect types over separate SNP,  
110 haplotype and epistasis models. We hypothesize that some traits involve only a small number of  
111 the effect types, some traits are more complex and involve more effect types, global low-order  
112 epistasis are more important than local high-order epistasis effects of haplotypes for some traits  
113 whereas the reverse is true for some other traits, and some traits may be affected by both global  
114 low-order and local high-order epistasis effects. The methodology in this article will provide an  
115 approach to evaluate these hypotheses, facilitate the discovery and utilization of global low-order

116 and local high-order epistasis effects relevant to the phenotypic variance and prediction accuracy  
117 of each trait, and obtain new knowledge of complex genetic mechanisms underlying quantitative  
118 traits.

119

## 120 **METHODS**

### 121 **Quantitative genetics (QG) model with SNP, haplotype and epistasis effects and values**

122 The mixed model with single-SNP additive and dominance effects, haplotype additive effects and  
123 pairwise SNP epistasis effects in this article is based on the quantitative genetics (QG) model  
124 resulting from the genetic partition of single-SNP genotypic values [9, 10], haplotype genotypic  
125 values [27], and pairwise genotypic values [1]. An advantage of this QG model is the readily  
126 available quantitative genetics interpretations of SNP additive and dominance effects, values and  
127 variances; haplotype additive effects, values and variances; epistasis effects, values and variances;  
128 and the corresponding SNP, haplotype and epistasis heritability estimates. Two QG models are  
129 developed: Model-I with 10 effect types including SNP additive and dominance effects, haplotype  
130 additive effects, and epistasis effects up to the third-order; and Model-II with 13 effect types  
131 resulting from replacing the pairwise epistasis effects of Model-I with intra- and inter-chromosome  
132 epistasis effects. Detailed descriptions of the effects, values, model matrices and the coding of the  
133 model matrices as well as the precise definition of each term in the two QG models are provided  
134 in **Supplementary Text S1 and Table S1**. With these precise definitions of genetic effects, values  
135 and model matrices in the QG models, a concise multifactorial QG model covering both Model-I  
136 and Model-II is established, i.e.:

$$137 \quad \mathbf{g} = \mu \mathbf{I} + \sum_{i=1}^f \mathbf{W}_i \boldsymbol{\tau}_{i_0} = \mu \mathbf{I} + \sum_{i=1}^f \mathbf{u}_i \quad (1)$$

$$138 \quad \mathbf{u}_i = \mathbf{W}_i \boldsymbol{\tau}_{i_0} \quad (2)$$

139 where  $\tau_{io}$  = genetic effects of the  $i^{\text{th}}$  effect type from the original QG model based on genetic  
 140 partition,  $\mathbf{W}_i$  = model matrix of  $\tau_{io}$ ,  $\mathbf{u}_i$  = genetic values of the  $i^{\text{th}}$  effect type from the original  
 141 QG model, and  $f$  = number of effect types. For Model-I, subscripts  $i=1,\dots,10$  represent SNP  
 142 additive (A), SNP dominance (D), haplotype additive,  $A \times A$ ,  $A \times D$ ,  $D \times D$ ,  $A \times A \times A$ ,  $A \times A \times D$ ,  
 143  $A \times D \times D$  and  $D \times D \times D$  effects sequentially. For Model-II, subscripts  $i=1,\dots,13$  represent SNP  
 144 additive, SNP dominance, haplotype additive, intra-chromosome  $A \times A$ , intra-chromosome  $A \times D$ ,  
 145 intra-chromosome  $D \times D$ , inter-chromosome  $A \times A$ , inter-chromosome  $A \times D$ , inter-chromosome  
 146  $D \times D$ ,  $A \times A \times A$ ,  $A \times A \times D$ ,  $A \times D \times D$  and  $D \times D \times D$  effects sequentially. The variance-covariance  
 147 matrix of the genetic values of Equations 1 and 2 is:

$$148 \quad \mathbf{G} = \text{var}\left(\sum_{i=1}^f \mathbf{u}_i\right) = \sum_{i=1}^f \text{Var}(\mathbf{u}_i) = \sum_{i=1}^f \mathbf{G}_i = \sum_{i=1}^f \sigma_{io}^2 \mathbf{W}_i \mathbf{W}_i' \quad (3)$$

$$149 \quad \text{Var}(\tau_{io}) = \sigma_{io}^2 \mathbf{I} \quad (4)$$

$$150 \quad \mathbf{G}_i = \text{Var}(\mathbf{u}_i) = \mathbf{W}_i \text{Var}(\tau_{io}) \mathbf{W}_i' = \sigma_{io}^2 \mathbf{W}_i \mathbf{W}_i' \quad (5)$$

151 where  $\sigma_{io}^2 = \text{Var}(\tau_{io})$  = genetic variance of the  $i^{\text{th}}$  effect type under the original QG model common  
 152 to all individuals (all  $j$  values). Note that  $\mathbf{W}_i \mathbf{W}_i'$  is not a genomic relationship matrix but is the  
 153 primary information for calculating each genomic relationship matrix. The structure of the  $\mathbf{G}$   
 154 matrix of Equation 3 assumes independence between the genetic values of different effect types.  
 155 However, the GBLUP values of different effect types using the  $\mathbf{G}$  matrix of Equation 3 could be  
 156 correlated. Under the Hardy-Weinberg equilibrium (HWE) and LE assumptions, additive,  
 157 dominance and epistasis effects are independent of each other [1, 2]. For genome-wide SNPs, the  
 158 LE assumption generally does not hold for closely linked loci, and nonzero Hardy-Weinberg  
 159 disequilibrium (HWD) may exist numerically. These and other unknown factors in real data may  
 160 result in the existence of correlations between different effect types. Haplotype additive values are



161 correlated with SNP additive effects because a haplotype additive value is the sum of all SNP  
 162 additive values and an epistasis value within the haplotype block plus a potential haplotype loss  
 163 [28]. In two recent haplotype studies for genomic prediction, the integration of SNP and haplotype  
 164 effects increased the prediction accuracy for four of the seven traits in the human study [23] and  
 165 for three of the eight traits in the swine study [24], showing that SNP and haplotype additive values  
 166 compensated each other for prediction accuracy and that the correlation between SNP and  
 167 haplotype additive values were incomplete for those traits. The correlation between haplotype and  
 168 epistasis values can be complex: the correlation should be nonexistent if the  $A \times A$  values are inter-  
 169 chromosome  $A \times A$  values or intra-chromosome  $A \times A$  values involving distal SNPs not covered by  
 170 the haplotypes, but the correlation could be strong if the  $A \times A$  values are intra-chromosome  $A \times A$   
 171 values involving proximal SNPs covered by the haplotypes.

## 172 **The reparametrized and equivalent QG model for genomic estimation and prediction**

173 Genomic relationship matrices will be used for genomic estimation and prediction, and the use of  
 174 genomic relationship matrices results in a reparametrized and equivalent model of the original QG  
 175 model for genetic values, to be referred to as the RE-QG model, where “reparametrized” refers to  
 176 the reparameterization of the genetic effects, model matrix and genetic variance of each effect type;  
 177 and “equivalent” refers to the requirement of the same first and second moments for the original  
 178 QG model (Equations 1-5) and the RE-QG model described below. This RE-QG model of genetic  
 179 values can be expressed as:

$$180 \quad \mathbf{g} = \mu \mathbf{I} + \sum_{i=1}^f \mathbf{T}_i \boldsymbol{\tau}_i = \mu \mathbf{I} + \sum_{i=1}^f \mathbf{u}_i \quad (6)$$

$$181 \quad \mathbf{G} = \text{var}(\sum_{i=1}^f \mathbf{u}_i) = \sum_{i=1}^f \mathbf{G}_i = \sum_{i=1}^f \sigma_i^2 \mathbf{T}_i \mathbf{T}_i' = \sum_{i=1}^f \sigma_i^2 \mathbf{S}_i = \sum_{i=1}^f \sigma_{io}^2 \mathbf{W}_i \mathbf{W}_i' \quad (7)$$

182 where

$$183 \quad \boldsymbol{\tau}_i = \sqrt{k_i} \boldsymbol{\tau}_{io} = \text{genetic effects of the } i^{\text{th}} \text{ effect type} \quad (8)$$

184  $\mathbf{T}_i = \mathbf{W}_i / \sqrt{k_i} = \text{model matrix of } \boldsymbol{\tau}_i$  (9)

185  $\sigma_i^2 = \text{Var}(\tau_{ij}) = \text{tr}(\mathbf{G}_i)/n = \sum_{j=1}^n G_i^{jj}/n = k_i \sigma_{io}^2$  (10)

186 = variance of the genetic effects of the  $i^{\text{th}}$  effect type common to all individuals

187 = average variance of all individuals for the genetic values of the  $i^{\text{th}}$  effect type

188  $\mathbf{u}_i = \mathbf{T}_i \boldsymbol{\tau}_i = \mathbf{W}_i \boldsymbol{\tau}_{io} = \text{genetic values of the } i^{\text{th}} \text{ effect type}$  (11)

189  $\mathbf{G}_i = \text{Var}(\mathbf{u}_i) = \sigma_i^2 \mathbf{T}_i \mathbf{T}_i' = \sigma_i^2 \mathbf{S}_i = \sigma_{io}^2 \mathbf{W}_i \mathbf{W}_i'$  (12)

190 = variance-covariance matrix of the genetic values of the  $i^{\text{th}}$  effect type

191  $\mathbf{S}_i = \mathbf{T}_i \mathbf{T}_i' = \mathbf{W}_i \mathbf{W}_i' / k_i = \text{genomic relationship matrix of the } i^{\text{th}} \text{ effect type}$  (13)

192  $k_i = \text{tr}(\mathbf{W}_i \mathbf{W}_i')/n = \text{average of the diagonal elements of } \mathbf{W}_i \mathbf{W}_i'$  (14)

193 Equations 8-10 are the reparametrization of the genetic effects, model matrices and genetic  
 194 variances of the original QG model, whereas Equations 11 and 12 show the genetic values and the  
 195 variance-covariance matrix of the genetic values are the same under the RE-QG and QG models.  
 196 In Equation 10,  $G_i^{jj}$  = the genetic variance of the  $j^{\text{th}}$  individual for the  $i^{\text{th}}$  effect type = the  $j^{\text{th}}$   
 197 diagonal element of the  $\mathbf{G}_i$  matrix defined by Equation 12. The  $k_i$  formula of Equation 14 as the  
 198 average of the diagonal elements of  $\mathbf{W}_i \mathbf{W}_i'$  was originally proposed for genomic additive  
 199 relationships [8], and was used for genomic dominance relationships [9, 10], haplotype additive  
 200 genomic relationships [27], and pairwise epistasis genomic relationships [6]. The need of this RE-  
 201 QG model is due to the use of the genomic relationship matrices (e.g., Equation 13), because the  
 202 QG model does not contain genomic relationship matrices (Equation 3). Detailed notations of the  
 203 QG model of Equations 1-5 in reference to the RE-QG model described by Equations 6-14 are  
 204 summarized in **Supplementary Table S1**.

205 The formula of genomic relationship matrix ( $S_i$  of Equation 13) is based on the model matrix  
206 of each effect type and can be difficult or impossible to compute if epistasis model matrices are  
207 used. This computing difficulty of epistasis model matrices is removed by calculating  $S_i$  based on  
208 the model matrices of SNP additive and dominance effects without creating the epistasis model  
209 matrices using either AGERM or EGERM. AGERM refers the genomic version of Henderson's  
210 Hadamard products between pedigree additive and dominance relationship matrices [3] with the  
211 pedigree additive and dominance relationship matrices replaced by the genomic additive and  
212 dominance relationship matrices [4-6]. AGERM contains intra-locus epistasis that should not exist  
213 [11] and EGERM removes intra-locus epistasis from AGERM based on products between genomic  
214 additive and dominance relationship matrices [11, 13].

215 The QG and RE-QG models have the same prediction accuracy due to the equivalence between  
216 these two models. The genetic values ( $u_i$ , Equations 1 and 6) and the variance-covariance matrix  
217 of the genetic values ( $G_i$ , Equations 5 and 12) under the QG and RE-QG models are identical,  
218 although these two equations have different expressions for the genetic effects and model matrices.  
219 Consequently, the QG model without using genomic relationship matrices and the RE-QG model  
220 using genomic relationship matrices have identical accuracy of genomic prediction. The choice of  
221 the  $k_i$  formula for defining the genomic relationship matrix does not affect the accuracy of  
222 genomic prediction but affects the interpretation and application of the genetic variance and  
223 genomic relationships for each effect type. Since the interpretation of each genetic variance is a  
224 focus whereas the interpretation of the genomic relationships is not a focus in this study, the  
225 interpretation of the genetic variance and associated heritability is the consideration in choosing  
226 the  $k_i$  formula of Equation 14.

227 The RE-QG model using genomic relationships (Equations 6-14) has two major advantages  
228 over the QG model without using genomic relationship matrices (Equations 1-5) although the two  
229 models have the same prediction accuracy. First, the use of genomic relationships, originally  
230 proposed for genomic additive relationships [7], provides a genomic version of the traditional  
231 theory and methods of best linear unbiased prediction (BLUP) that uses pedigree relationships,  
232 and this genomic version can utilize a wealth of BLUP-based theory, methods and computing  
233 strategies. Second, the genetic variance of the genetic effects of each effect type under the RE-QG  
234 model can be used for estimating genomic heritability whereas the genetic variance of the genetic  
235 effects under the QG model cannot be used for estimating genomic heritability. With the  $k_i$  value  
236 defined by Equation 14, The variance of the genetic effects of the  $i^{\text{th}}$  effect type,  $\sigma_i^2 = k_i \sigma_{i0}^2$   
237 (Equation 10), has the unique interpretation as the average variance of the genotypic values of all  
238 individuals and is a common variance to all individuals. Moreover,  $\sigma_i^2 = k_i \sigma_{i0}^2$  is unaffected by the  
239 number of levels for each effect type, unless the number of levels such as the number of SNPs is  
240 too small to provide sufficient coverage of the genome [9, 23, 29]. In contrast, the QG model does  
241 not have a method to estimate genetic variance components for calculating genomic heritabilities,  
242 because  $\sigma_{i0}^2$  is an inverse function of the number of effect levels. As the number of effect levels  
243 such as the number of SNPs increases or decreases, the value of each element in  $\mathbf{W}_i \mathbf{W}_i'$  changes  
244 in the same direction and the  $\sigma_{i0}^2$  estimate changes in the opposite direction, i.e., as the number of  
245 effect levels increases or decreases,  $\sigma_{i0}^2$  decreases or increases. Consequently, the  $\sigma_{i0}^2$  estimate does  
246 not have a unique interpretation and cannot be used for estimating genomic heritability [9].  
247 Moreover, the variance of the genetic value of an individual ( $\sigma_{i0}^2 (\mathbf{W}_i \mathbf{W}_i')^{jj}$ ) cannot be used for

248 calculating genomic heritability because of the individual specificity of the  $(\mathbf{W}_i \mathbf{W}_i')^{jj}$  values, as  
 249 shown as follows.

250 The exact relationship between the genetic variance for the  $i^{\text{th}}$  effect type of the  $j^{\text{th}}$  individual  
 251 under the RE-QG model and the QG model can be described based on the  $\mathbf{G}_i$  matrix defined by  
 252 Equation 12, i.e.:

$$253 \quad G_i^{jj} = \text{Var}(u_{ij}) = \sigma_i^2 (\mathbf{S}_i)^{jj} = \sigma_{io}^2 (\mathbf{W}_i \mathbf{W}_i')^{jj} \quad (15)$$

254 where  $G_i^{jj}$  = the  $j^{\text{th}}$  diagonal element of the  $\mathbf{G}_i$  matrix defined by Equation 12 = the genetic  
 255 variance of the  $j^{\text{th}}$  individual for the genotypic value of the  $i^{\text{th}}$  effect type, and  $u_{ij}$  = the  $j^{\text{th}}$   
 256 element of  $\mathbf{u}_i$  defined by Equation 11. Equation 15 shows that different individuals do not have a  
 257 common variance of the genetic values ( $G_i^{jj}$ ) unless all diagonal elements of  $\mathbf{S}_i$  or  $\mathbf{W}_i \mathbf{W}_i'$  are  
 258 identical, which could not happen with genome-wide SNP data in the absence of identical twins  
 259 because genome-wide SNPs have a high degree of individual specificity. Consequently,  $G_i^{jj}$  is not  
 260 a common variance to all individuals and cannot be used for calculating the genomic heritability  
 261 of the  $i^{\text{th}}$  effect type. In contrast,  $\sigma_i^2$  of Equation 10 under the RE-QG model as the average  
 262 variance of the genotypic values of all individuals is common to all individuals and can be used  
 263 for calculating the heritability of each effect type. For the example of Model-I, the exact genetic  
 264 interpretation of  $G_i^{jj}$  is:  $G_1^{jj} = \sigma_{aj}^2$  = the variance of the genomic additive (breeding) value of the  $j^{\text{th}}$   
 265 individual for  $i=1$ ,  $G_2^{jj} = \sigma_{dj}^2$  = the variance of the genomic dominance value of the  $j^{\text{th}}$  individual  
 266 for  $i=2$ ,  $G_3^{jj} = \sigma_{abj}^2$  = the variance of the genomic haplotype additive value of the  $j^{\text{th}}$  individual  
 267 for  $i=3$ ,  $G_4^{jj} = \sigma_{aaj}^2$  = the variance of the A×A value of the  $j^{\text{th}}$  individual for  $i=4$ ,  $G_5^{jj} = \sigma_{adj}^2$  = the  
 268 variance of the A×D value of the  $j^{\text{th}}$  individual for  $i=5$ ,  $G_i^{jj} = \sigma_{ddj}^2$  = the variance of the D×D value

269 of the  $j^{\text{th}}$  individual for  $i=6$ ,  $G_i^{jj} = \sigma_{aaa}^2 =$  the variance of the  $A \times A \times A$  value of the  $j^{\text{th}}$  individual  
 270 for  $i=7$ ,  $G_i^{jj} = \sigma_{aad}^2 =$  the variance of the  $A \times A \times D$  value of the  $j^{\text{th}}$  individual for  $i=8$ ,  $G_i^{jj} = \sigma_{add}^2 =$   
 271 the variance of the  $A \times D \times D$  value of the  $j^{\text{th}}$  individual for  $i=9$ , and  $G_i^{jj} = \sigma_{ddd}^2 =$  the variance of  
 272 the  $D \times D \times D$  value of the  $j^{\text{th}}$  individual for  $i=10$ . These genetic interpretations along with those  
 273 for intra- and inter-chromosome pairwise epistasis effects of Model-II under the QG and RE-QG  
 274 models are summarized in **Supplementary Table S1**.

275

## 276 **RESULTS AND DISCUSSION**

### 277 **The multifactorial model of phenotypic values**

278 Based on the RE-QG model of Equations 6-14, the multifactorial model for phenotypic values is:

$$279 \quad \begin{aligned} \mathbf{y} &= \mathbf{X}\mathbf{b} + \mathbf{Z}\mathbf{g} + \mathbf{e} = \mathbf{X}\mathbf{b} + \mathbf{Z} \sum_{i=1}^f \mathbf{T}_i \boldsymbol{\tau}_i + \mathbf{e} \\ &= \mathbf{X}\mathbf{b} + \mathbf{Z} \sum_{i=1}^f \mathbf{u}_i + \mathbf{e} \end{aligned} \quad (16)$$

$$280 \quad \begin{aligned} \mathbf{V} &= \mathbf{Z}\mathbf{G}\mathbf{Z}' + \sigma_e^2 \mathbf{I}_N = \mathbf{Z} \left( \sum_{i=1}^f \mathbf{G}_i \right) \mathbf{Z}' + \sigma_e^2 \mathbf{I}_N \\ &= \mathbf{Z} \left( \sum_{i=1}^f \sigma_i^2 \mathbf{T}_i \mathbf{T}_i' \right) \mathbf{Z}' + \sigma_e^2 \mathbf{I}_N = \mathbf{Z} \left( \sum_{i=1}^f \sigma_i^2 \mathbf{S}_i \right) \mathbf{Z}' + \sigma_e^2 \mathbf{I}_N \end{aligned} \quad (17)$$

281 where  $\mathbf{y} = N \times 1$  column vector of phenotypic observations,  $\mathbf{Z} = N \times n$  incidence matrix allocating  
 282 phenotypic observations to each individual = identity matrix for one observation per individual ( $N$   
 283 =  $n$ ),  $N$  = number of observations,  $n$  = number of individuals,  $\mathbf{b} = c \times 1$  column vector of fixed  
 284 effects such as herd-year-season in dairy cattle,  $c$  = number of fixed effects,  $\mathbf{X} = N \times c$  model  
 285 matrix of  $\mathbf{b}$ ,  $\mathbf{e} = N \times 1$  column vector of random residuals,  $\sigma_e^2 =$  residual variance, and  $\mathbf{G} = \sum_{i=1}^f \mathbf{G}_i$   
 286 (Equation 7). The phenotypic values ( $\mathbf{y}$ ) are assumed to follow a normal distribution with mean  
 287  $\mathbf{X}\mathbf{b}$  and variance-covariance matrix of  $\mathbf{V}$ . The methods described below for genomic estimation  
 288 and prediction are based on the conditional expectation (CE) method, which is more efficient

289 computationally than the methods based on mixed model equations (MME) when the number of  
290 genetic effects is greater than the number of individuals [9, 27].

291 For Model-I with 10 effect types, the genomic epistasis relationship matrices can be calculated  
292 using either EGERM or AGERM. However, EGERM or AGERM did not consider intra- and inter-  
293 chromosome genomic epistasis relationship matrices that are required by Model-II with 13 effect  
294 types. This research derives intra- and inter-chromosome genomic epistasis relationship matrices  
295 for both EGERM and AGERM.

### 296 **Intra- and inter-chromosome genomic epistasis relationship matrices**

297 The main derivation of the intra- and inter-chromosome genomic epistasis relationship matrices is  
298 the partition of the numerator of a genomic epistasis relationship matrix into intra- and inter-  
299 chromosome numerators. The first step is to derive the intra-chromosome numerator, and the  
300 second step is to derive the inter-chromosome numerator as the difference between whole-genome  
301 numerator and the intra-chromosome numerator. The last step is to divide the intra-chromosome  
302 numerator by the average of the diagonal elements of the intra-chromosome numerator, and to  
303 divide the inter-chromosome numerator by the average of the diagonal elements of the inter-  
304 chromosome numerator. Using this procedure, intra- and inter-chromosome epistasis relationship  
305 matrices were derived for both EGERM and AGERM (**Supplementary Text 1**).

### 306 **Genomic best linear unbiased prediction (GBLUP) and reliability**

307 Based on the multifactorial genetic model of Equations 16 and 17, the GBLUP of the genetic  
308 values of the  $i^{\text{th}}$  effect type ( $\hat{\mathbf{u}}_i$ ) and the best linear unbiased estimator (BLUE) or generalized  
309 least squares (GLS) estimator of fixed effect ( $\hat{\mathbf{b}}$ ) are:

$$310 \quad \hat{\mathbf{u}}_i = \sigma_i^2 \mathbf{S}_i \mathbf{Z}' \mathbf{V}^{-1} (\mathbf{y} - \mathbf{X}\hat{\mathbf{b}}) = \sigma_i^2 \mathbf{S}_i \mathbf{Z}' \mathbf{P} \mathbf{y}, \quad i = 1, \dots, f \quad (18)$$

$$311 \quad \hat{\mathbf{b}} = (\mathbf{X}' \mathbf{V}^{-1} \mathbf{X})^{-1} \mathbf{X}' \mathbf{V}^{-1} \mathbf{y} \quad (19)$$

312 where  $\mathbf{P} = \mathbf{V}^{-1} - \mathbf{V}^{-1}\mathbf{X}(\mathbf{X}'\mathbf{V}^{-1}\mathbf{X})^{-1}\mathbf{X}'\mathbf{V}^{-1}$ . The GBLUP of total genetic values of the  $n$  individuals  
 313 is the summation of all types of genetic values:

$$314 \quad \hat{\mathbf{g}} = \sum_{i=1}^f \hat{\mathbf{u}}_i \quad (20)$$

315 Reliability of GBLUP is the squared correlation between the GBLUP of a type of genetic values  
 316 and the unobservable true genetic values being predicted by the GBLUP. The expected accuracy  
 317 of predicting the genetic values by the GBLUP is the square root of reliability, or the correlation  
 318 between the GBLUP of a type of genetic effects and the unobservable true genetic effects being  
 319 predicted by the GBLUP. In the absence of validation studies for observed prediction accuracy,  
 320 reliability or the expected prediction accuracy is the measure of prediction accuracy of the GBLUP.  
 321 The reliability of the GBLUP of the total genetic value (Equation 20) of the  $j^{\text{th}}$  individual is:

$$322 \quad R_{gj}^2 = [\mathbf{G}(\mathbf{Z}'\mathbf{PZ})\mathbf{G}]^{jj} / \mathbf{G}^{jj} \quad (21)$$

323 where  $\mathbf{G} = \sum_{i=1}^f \mathbf{G}_i = \sum_{i=1}^f \sigma_i^2 \mathbf{T}_i \mathbf{T}_i' = \sum_{i=1}^f \sigma_i^2 \mathbf{S}_i$  (Equation (36)),  $\mathbf{G}^{jj} = \sum_{i=1}^f \mathbf{G}_i^{jj} = \sum_{i=1}^f \sigma_i^2 \mathbf{S}_i^{jj}$ , and  
 324 subscript or superscript  $jj$  denotes the  $j^{\text{th}}$  diagonal element. The reliability formula for any or a  
 325 combination of genetic values can be readily derived from Equation 21, e.g., the reliability of  $\hat{\mathbf{u}}_3$   
 326 (GBLUP of haplotype additive values) is obtained from Equation 21 by deleting all terms except  
 327  $\mathbf{G}_3(\mathbf{Z}'\mathbf{PZ})\mathbf{G}_3$  in the numerator and  $\sigma_3^2 \mathbf{S}_3^{jj}$  in the denominator, with changes in the  $\mathbf{V}$  and  $\mathbf{P}$   
 328 matrices accordingly.

### 329 **Calculation of GBLUP and reliability for individuals with and without phenotypic** 330 **observations separately**

331 Two strategies are available for calculating GBLUP and reliability of Equations 20 and 21.  
 332 Strategy-1 is a one-step strategy that include all individuals with and without phenotypic  
 333 observations in the same system of equations so that GBLUP and reliability are calculated



334 simultaneously for all individuals. This strategy essentially augments the mixed model for  
335 individuals with phenotypic observations with a set of null equations consists of ‘0’s but uses each  
336 genomic relationship matrix for all individuals, and these null equations and the use of the  
337 relationship matrix for all individuals do not affect the GBLUP, reliability and heritability of  
338 individuals with phenotypic observations. The advantage of this one-step strategy is the simplicity  
339 of data preparation. For example, for a k-fold cross validation study, the phenotypic input file only  
340 needs to have k columns of the trait observations, with one column for each validation where the  
341 phenotypic observations for the validation individuals are set as ‘missing’ and the **X** and **Z** model  
342 matrices for the ‘missing’ observations are set to zero. With this strategy, the genotypic data needs  
343 to be processed only once. As the number of traits increases for validation studies, this one-step  
344 strategy becomes more appealing due to the savings in data preparation work. This strategy has  
345 been implemented in our computing tools of GVCBLUP [30], GVCHAP [31] and EPIHAP [15,  
346 16]. However, when the number of validation individuals or individuals without phenotypic values  
347 is large, each genomic relationship matrix ( $S_i$  matrix) is large and the one-step strategy becomes  
348 more difficult as the number of individuals increases.

349 For large numbers of calculating GBLUP for individuals with and without phenotypic values  
350 separately is more efficient computationally than calculating GBLUP for all individuals in the  
351 same system of equations by applying Henderson’s BLUP for animals without phenotypic  
352 observations [32] to GBLUP. Let  $n_1$  = number of individuals with phenotypic observations,  $n_0$  =  
353 number of individuals without phenotypic observations,  $n = n_1 + n_0$ , and let the  $S_i$  matrix be  
354 partitioned as:

$$355 \quad S_i = \begin{bmatrix} S_{i11} & S_{i10} \\ S_{i01} & S_{i00} \end{bmatrix}, \quad i=1, \dots, f \quad (22)$$

356 where  $\mathbf{S}_{i11} = n_1 \times n_1$  genomic relationship matrix of the genetic values of the  $i^{\text{th}}$  effect type for  
 357 individuals with phenotypic observations,  $\mathbf{S}_{i01} = n_0 \times n_1 =$  genomic relationship matrix of the  
 358 genetic values of the  $i^{\text{th}}$  effect type between individuals without phenotypic observations and  
 359 individuals with phenotypic observations,  $\mathbf{S}_{i10} = \mathbf{S}_{i01}' = n_1 \times n_0 =$  genomic relationship matrix  
 360 between individuals with phenotypic observations and individuals without phenotypic  
 361 observations, and  $\mathbf{S}_{i00} = n_0 \times n_0$  genomic relationship matrix of the genetic values of the  $i^{\text{th}}$  effect  
 362 type for individuals without phenotypic observations. In Equations 16 and 17,  $\mathbf{y} = \mathbf{y}_1$ , and the  $\mathbf{Z}$   
 363 matrix needs to be changed to  $\mathbf{Z} = [\mathbf{Z}_1 \quad \mathbf{0}]$ , the  $\mathbf{u}_i$  vector partitioned as  $\mathbf{u}_i = [\mathbf{u}_{i1}' \quad \mathbf{u}_{i0}']'$ , and the  
 364  $\mathbf{g}$  vector partitioned as  $\mathbf{g} = [\mathbf{g}_1' \quad \mathbf{g}_0']$ , where  $\mathbf{Z}_1 = N \times n_1$  incidence matrix allocating phenotypic  
 365 observations to individuals with phenotypic observations,  $\mathbf{0} = N \times n_0$  incidence matrix with  
 366 elements '0' connecting phenotypic observations to individuals without phenotypic observations.  
 367 With these changes and Equation 22, the  $\mathbf{V}$  matrix of Equation 17 can be re-written as:

$$368 \quad \mathbf{V} = \mathbf{Z}_1 \left( \sum_{i=1}^f \mathbf{G}_i \right) \mathbf{Z}_1' + \sigma_e^2 \mathbf{I}_N = \mathbf{Z}_1 \left( \sum_{i=1}^f \sigma_i^2 \mathbf{S}_{i11} \right) \mathbf{Z}_1' + \sigma_e^2 \mathbf{I}_N \quad (23)$$

369 and the GBLUP and reliability for individuals with and without phenotypic observations can be  
 370 calculated as:

$$371 \quad \hat{\mathbf{u}}_{i1} = \sigma_i^2 \mathbf{S}_{i11} \mathbf{Z}_1' \mathbf{V}^{-1} (\mathbf{y}_1 - \mathbf{X}\hat{\mathbf{b}}) = \sigma_i^2 \mathbf{S}_{i11} \mathbf{Z}_1' \mathbf{P}\mathbf{y}_1, \quad i=1, \dots, f \quad (24)$$

$$372 \quad \hat{\mathbf{g}}_1 = \sum_{i=1}^f \hat{\mathbf{u}}_{i1} \quad (25)$$

$$373 \quad R_{g1j}^2 = [\mathbf{G}_{11} (\mathbf{Z}_1' \mathbf{P}\mathbf{Z}_1) \mathbf{G}_{11}]^{jj} / \mathbf{G}_{11}^{jj} \quad (26)$$

$$374 \quad \hat{\mathbf{u}}_{i0} = \sigma_i^2 \mathbf{S}_{i01} \mathbf{Z}_1' \mathbf{V}^{-1} (\mathbf{y}_1 - \mathbf{X}\hat{\mathbf{b}}) = \sigma_i^2 \mathbf{S}_{i01} \mathbf{Z}_1' \mathbf{P}\mathbf{y}_1, \quad i=1, \dots, f \quad (27)$$

$$375 \quad = \sigma_i^2 \mathbf{S}_{i01} \mathbf{S}_{i11}^{-1} \mathbf{S}_{i11} \mathbf{Z}_1' \mathbf{P}\mathbf{y}_1 = \mathbf{G}_{i01} \mathbf{G}_{i11}^{-1} \mathbf{G}_{i11} \mathbf{Z}_1' \mathbf{P}\mathbf{y}_1 = \mathbf{G}_{i01} \mathbf{G}_{i11}^{-1} \hat{\mathbf{u}}_{i1}, \quad i=1, \dots, f \quad (28)$$

$$376 \quad \hat{\mathbf{g}}_0 = \sum_{i=1}^f \hat{\mathbf{u}}_{i0} \quad (29)$$

$$377 \quad R_{g_{0j}}^2 = [\mathbf{G}_{01}(\mathbf{Z}_1' \mathbf{PZ}_1) \mathbf{G}_{10}]^{jj} / \mathbf{G}_{00}^{jj} \quad (30)$$

378 where  $\hat{\mathbf{u}}_i = n_1 \times 1$  column vector of the GBLUP of the genetic values of the  $i^{\text{th}}$  effect type for  
 379 individuals with phenotypic observations,  $\hat{\mathbf{g}}_i = n_1 \times 1$  column vector of the GBLUP of the total  
 380 genetic values for individuals with phenotypic observations,  $R_{g_{1j}}^2 =$  reliability for the  $j^{\text{th}}$   
 381 individuals with phenotypic observations,  $\hat{\mathbf{u}}_{i0} = n_0 \times 1$  column vector of the GBLUP of the genetic  
 382 values of the  $i^{\text{th}}$  effect type for individuals without phenotypic observations  $\hat{\mathbf{g}}_0 = n_0 \times 1$  column  
 383 vector of the GBLUP of the total genetic values for individuals without phenotypic observations,  
 384  $R_{g_{0j}}^2 =$  reliability for the  $j^{\text{th}}$  individuals without phenotypic observations,

$$385 \quad \mathbf{G}_{11} = \sum_{i=1}^f \mathbf{G}_{i11} = \sum_{i=1}^f \sigma_i^2 \mathbf{S}_{i11}, \quad \mathbf{G}_{01} = \sum_{i=1}^f \mathbf{G}_{i01} = \sum_{i=1}^f \sigma_i^2 \mathbf{S}_{i01}, \quad \mathbf{G}_{10} = \sum_{i=1}^f \mathbf{G}_{i10} = \sum_{i=1}^f \sigma_i^2 \mathbf{S}_{i10},$$

$$386 \quad \mathbf{G}_{11}^{jj} = \sum_{i=1}^f \mathbf{S}_{i11}^{jj} \sigma_i^2, \text{ and } \mathbf{G}_{00}^{jj} = \sum_{i=1}^f \mathbf{S}_{i00}^{jj} \sigma_i^2.$$

387 Equations 27 and 28 yield identical results if  $\mathbf{S}_{i11}^{-1}$  exists. However, when the number of  
 388 individuals is greater than the number of effect levels such as the number of SNPs,  $\mathbf{S}_{i11}^{-1}$  in Equation  
 389 28 does not exist and Equation 27 still can calculate the GBLUP. The usefulness of Equation 28  
 390 is showing the GBLUP of individuals without phenotypic observations is the regression of the  
 391 genetic values of individuals without phenotypic observations on the genetic values of individuals  
 392 with phenotypic observations. The advantage of Equation 27 is that it does not calculate  $\mathbf{S}_{i11}^{-1}$  and  
 393 hence is unaffected by the singularity of  $\mathbf{S}_{i11}$ . Therefore, Equation 27 is recommended for  
 394 calculating GBLUP for individuals without phenotypic observation when the number of such  
 395 individuals is large. The GBLUP calculations of Equations 24, 27 and 28 do not involve the  
 396 genomic relationship matrix among individuals without phenotypic observations  $\mathbf{S}_{i00}$ , which is  
 397 much larger than  $\mathbf{S}_{i11}$  when  $n_1$  is much larger than  $n_0$ . The reliability calculation for individuals

398 without phenotypic observations (Equation 30) only uses the diagonal elements of  $\mathbf{S}_{i00}$ , not the  
 399 entire  $\mathbf{S}_{i00}$ .

#### 400 **Advantage of integrated model over separate models**

401 The multifactorial model of Equations 16 and 17 integrating SNP, haplotype and epistasis effects  
 402 have the advantage of using more effect types and assessing each effect type based on the  
 403 phenotypic values adjusted for all remaining effect types over separate models for SNP, haplotype  
 404 and epistasis effects that do not have a mechanism to adjust for effect types not in the model and  
 405 each uses a smaller number of genetic effects in the model.

406 This advantage of the multifactorial model assessing each effect type based on the phenotypic  
 407 values adjusted for all remaining effect types can be shown using the MME version of the GBLUP  
 408 for the  $i^{\text{th}}$  effect type, i.e.,

$$\begin{aligned}
 \hat{\mathbf{u}}_i &= (\mathbf{Z}_i' \mathbf{Z}_i + \mathbf{G}_i^{-1})^{-1} [\mathbf{Z}_i' \mathbf{y} - (\mathbf{Z}_i' \mathbf{X} \hat{\mathbf{b}} + \sum_{j=1}^f \mathbf{Z}_i' \mathbf{Z}_j \hat{\mathbf{u}}_j)] \\
 &= (\mathbf{Z}_i' \mathbf{Z}_i + \mathbf{G}_i^{-1})^{-1} \mathbf{Z}_i' (\mathbf{y} - \mathbf{X} \hat{\mathbf{b}} - \sum_{j=1}^f \mathbf{Z}_j \hat{\mathbf{u}}_j) = (\mathbf{Z}_i' \mathbf{Z}_i + \mathbf{G}_i^{-1})^{-1} \mathbf{Z}_i' \mathbf{y}_{bu}^*
 \end{aligned}
 \tag{31}$$

$$\begin{aligned}
 \hat{\mathbf{b}} &= (\mathbf{X}' \mathbf{X})^{-1} (\mathbf{X}' \mathbf{y} - \mathbf{X}' \sum_{i=1}^f \mathbf{Z}_i \hat{\mathbf{u}}_i) \\
 &= (\mathbf{X}' \mathbf{X})^{-1} \mathbf{X}' (\mathbf{y} - \sum_{i=1}^f \mathbf{Z}_i \hat{\mathbf{u}}_i) = (\mathbf{X}' \mathbf{X})^{-1} \mathbf{X}' \mathbf{y}_u^*
 \end{aligned}
 \tag{32}$$

411 where  $\mathbf{y}_{bu}^* = \mathbf{y} - \mathbf{X} \hat{\mathbf{b}} - \sum_{j=1}^f \mathbf{Z}_j \hat{\mathbf{u}}_j$  = phenotypic observations adjusted for the fixed effects and all  
 412 random genetic values except those of  $\hat{\mathbf{u}}_i$ ,  $\mathbf{y}_u^* = \mathbf{y} - \sum_{i=1}^f \mathbf{Z}_i \hat{\mathbf{u}}_i$  = phenotypic observations adjusted  
 413 for all random genetic values, and  $(\mathbf{X}' \mathbf{X})^{-1}$  is a generalized inverse of  $\mathbf{X}' \mathbf{X}$ . Equation 31 shows  
 414 the MME version of  $\hat{\mathbf{u}}_i$  uses the phenotypic values adjusted for the GBLUP of all other effect  
 415 types in the model. Since the MME version of  $\hat{\mathbf{u}}_i$  (Equation 31) and  $\hat{\mathbf{b}}$  (Equation 32) are identical  
 416 to the CE version of  $\hat{\mathbf{u}}_i$  (Equation 18) and  $\hat{\mathbf{b}}$  (Equation 19), the CE version of  $\hat{\mathbf{u}}_i$  (Equation 18)

417 uses the phenotypic values adjusted for the GBLUP of all other effect types in the model even  
 418 though the CE version does not do such adjustments explicitly.

### 419 **Genomic restricted maximum estimation (GREML) of variances and heritabilities**

420 The estimation of variance components uses GREML and a combination of EM-REML and AI-  
 421 REML algorithms of iterative solutions. EM-REML is slow but converges whereas AI-REML is  
 422 fast but fails for zero heritability estimates. In our GVCBLUP and GVCHAP computing packages  
 423 that implement these two algorithms [30, 31], EM-REML is used automatically when AI-REML  
 424 fails. The EM-REML iterative algorithm for the multifactorial model of Equations 16 and 17 is:

$$425 \quad \sigma_i^{2(j+1)} = \sigma_i^{2(j)} \mathbf{y} \mathbf{P}^{(j)} \mathbf{Z} \mathbf{S}_i \mathbf{Z}' \mathbf{P}^{(j)} \mathbf{y} / \text{tr}(\mathbf{P}^{(j)} \mathbf{Z} \mathbf{S}_i \mathbf{Z}'), \quad i = 1, \dots, f \quad (33)$$

$$426 \quad \sigma_e^{2(j+1)} = \sigma_e^{2(j)} \mathbf{y} \mathbf{P}^{(j)} \mathbf{P}^{(j)} \mathbf{y} / \text{tr}(\mathbf{P}^{(j)}) \quad (34)$$

427 where  $j$  = iteration number. The AI-REML iterative algorithm is an extension of the early  
 428 formulations [33, 34] to the multifactorial model of Equations 16 and 17:

$$429 \quad \boldsymbol{\theta}^{(j+1)} = \boldsymbol{\theta}^{(j)} + (\mathbf{AI}^{(j)})^{-1} \boldsymbol{\Delta}^{(j)} \quad (35)$$

430 where  $\boldsymbol{\theta} = (\sigma_1^2, \sigma_2^2, \dots, \sigma_f^2, \sigma_{f+1}^2)'$  =  $(f+1) \times 1$  column vector of variance-covariance components,

431  $\sigma_{f+1}^2 = \sigma_e^2$  = residual variance,  $\boldsymbol{\Delta} = (\Delta_1, \Delta_2, \dots, \Delta_f, \Delta_{f+1})'$  =  $(f+1) \times 1$  column vector of the partial

432 derivatives of the log residual likelihood function with respect to each variance component, and  $j$

433 = iteration number. A typical term in  $\boldsymbol{\Delta}$  ( $\Delta_i$ ) and a typical term in  $\mathbf{AI}$  ( $AI_{ik}$ ) are:

$$434 \quad \begin{aligned} \Delta_i &= -\frac{1}{2} \text{tr}(\mathbf{P} \frac{\partial \mathbf{V}}{\partial \sigma_i^2}) + \frac{1}{2} \mathbf{y}' \mathbf{P} \frac{\partial \mathbf{V}}{\partial \sigma_i^2} \mathbf{P} \mathbf{y} \\ &= -\frac{1}{2} \text{tr}(\mathbf{P} \mathbf{Z} \mathbf{S}_i \mathbf{Z}') + \frac{1}{2} \mathbf{y}' \mathbf{P} \mathbf{Z} \mathbf{S}_i \mathbf{Z}' \mathbf{P} \mathbf{y}, \quad i = 1, \dots, f+1 \end{aligned} \quad (36)$$

$$435 \quad \begin{aligned} AI_{ik} &= \frac{1}{2} \mathbf{y}' \mathbf{P} \frac{\partial \mathbf{V}}{\partial \sigma_i^2} \mathbf{P} \frac{\partial \mathbf{V}}{\partial \sigma_k^2} \mathbf{P} \mathbf{y} \\ &= \frac{1}{2} \mathbf{y}' \mathbf{P} \mathbf{Z}' \mathbf{S}_i \mathbf{Z}' \mathbf{P} \mathbf{Z} \mathbf{S}_k \mathbf{Z}' \mathbf{P} \mathbf{y}, \quad i, k = 1, \dots, f+1 \end{aligned} \quad (37)$$

436 where  $\mathbf{S}_{f+1} = \mathbf{I}_N$ . For the full Model-I or Model-II, some effect types inevitably may have zero  
437 variances. In those cases, AI-REML (Equations 35-37) fails, and EM-REML (Equations 33 and  
438 34) still converges although slow convergence rate can be expected for the full Model-I or Model-  
439 II. Once the effect types with zero variances are removed from the model, AI-REML converges,  
440 and fast convergence rate can be expected. The estimate of the genomic heritability for each type  
441 of genetic effects ( $h_i^2$ ) and the total heritability of all types of genetic effects ( $H^2$ ) are:

$$442 \quad h_i^2 = \sigma_i^2 / \sigma_y^2 \quad i=1, \dots, f \quad (38)$$

$$443 \quad H^2 = \sum_{i=1}^f h_i^2 \quad (39)$$

444 where  $\sigma_y^2 = \sum_{i=1}^f \sigma_i^2 + \sigma_e^2 =$  phenotypic variance.

445 The heritability estimates of Equation 38 can be used for model selection by removing effect  
446 types with heritability estimates below a user determined threshold value from the prediction  
447 model. Since different traits may have different genetic architectures, we hypothesize that some  
448 traits may involve only a small number of the effect types and some traits are more complex and  
449 involve more effect types, global epistasis may be more important than local high-order epistasis  
450 effects of haplotypes for some traits whereas the reverse may be true for other traits, and some  
451 traits may be affected by both global high-order and local high-order epistasis effects. The  
452 heritability estimates from Equation 37 provide an approach to evaluate these hypotheses and  
453 identify effect types relevant to the phenotypic variance whereas the total heritability of Equation  
454 38 provides an estimate of the total genetic contribution to the phenotypic variance. In addition to  
455 the use of heritability estimates, prediction accuracy based on GBLUP can be used for model  
456 selection by requiring a threshold accuracy level for the effect type to be included in the prediction  
457 model, e.g., we identified the A + A×A model to have the same accuracy of predicting the  
458 phenotypic values of daughter pregnancy rate as the full Model-I in U.S. Holstein cows [15].

## 459 Estimation of pairwise epistasis effect and heritability

460 The heritability of a SNP, haplotype block or pairwise epistasis effect is the contribution of the  
 461 genetic effect to the phenotypic variance and is also the contribution to the heritability of the effect  
 462 type, and is estimated through the GBLUP of the corresponding genetic effects. These heritability  
 463 estimates can be used to identify genome locations with large contributions to the phenotypic  
 464 variance. The estimation of pairwise epistasis effects and heritability is the most demanding  
 465 computing because the pairwise epistasis model matrices must be created and are no longer  
 466 avoidable. Estimating the effects and heritabilities for third-order epistasis effects is  
 467 computationally unfeasible and is not considered. GBLUP of SNP, haplotype and pairwise  
 468 epistasis effects of Model-I (**Supplementary Table S1**) are calculated as:

$$469 \quad \hat{\boldsymbol{\tau}}_i = \sigma_i^2 \mathbf{T}_i' \mathbf{Z}' \mathbf{P} \mathbf{y} = \mathbf{T}_i' \mathbf{S}_i^{-1} \hat{\mathbf{u}}_i, \quad i=1-6 \quad (40)$$

470 where  $\hat{\boldsymbol{\tau}}_i$  is the  $m \times 1$  column vector of SNP additive effects for  $i=1$ , or SNP dominance effects  
 471 for  $i=2$ ; or  $b \times 1$  column vector of haplotype additive effects for  $i=3$ ; or  $\binom{m}{2} \times 1$  column vector  
 472 of  $A \times A$  epistasis effects for  $i=4$ , or  $2 \binom{m}{2} \times 1$  column vector of  $A \times D$  epistasis effects for  $i=5$ , or  
 473  $\binom{m}{2} \times 1$  column vector of  $D \times D$  epistasis effects for  $i=6$ . For  $i=5$ , the order of  $A \times D$  and  $D \times A$   
 474 effects is determined by the order of the model matrices of those effects, i.e.,  $\hat{\boldsymbol{\tau}}_5 = (\hat{\boldsymbol{\tau}}_{\alpha\delta}', \hat{\boldsymbol{\tau}}_{\delta\alpha}')$  if  
 475  $\mathbf{T}_5 = (\mathbf{T}_{\alpha\delta}, \mathbf{T}_{\delta\alpha})$ , or  $\hat{\boldsymbol{\tau}}_5 = (\hat{\boldsymbol{\tau}}_{\delta\alpha}', \hat{\boldsymbol{\tau}}_{\alpha\delta}')$  if  $\mathbf{T}_5 = (\mathbf{T}_{\delta\alpha}, \mathbf{T}_{\alpha\delta})$ . The heritability of the  $j^{\text{th}}$  effect of the  $i^{\text{th}}$   
 476 effect type ( $\hat{h}_{ij}^2$ ) is estimated as a fraction of the genomic heritability of the  $i^{\text{th}}$  effect type ( $\hat{h}_i^2$ ):

$$477 \quad \hat{h}_{ij}^2 = (\hat{\boldsymbol{\tau}}_{ij}^2 / \sum_{i=1}^m \hat{\boldsymbol{\tau}}_{ij}^2) \hat{h}_i^2 = (\hat{\boldsymbol{\tau}}_{ij}' / \hat{\boldsymbol{\tau}}_i' \hat{\boldsymbol{\tau}}_i) \hat{h}_i^2 = \hat{\sigma}_{ij}^2 / \hat{\sigma}_i^2 \quad (41)$$

478 where  $\hat{\boldsymbol{\tau}}_{ij}$  = the  $j^{\text{th}}$  effect of  $\hat{\boldsymbol{\tau}}_i$   $i=1-6$ ;  $\hat{\sigma}_i^2$  = estimated variance of the  $i^{\text{th}}$  effect type;  $\hat{\sigma}_{ij}^2$  =  
 479 estimated variance of the  $j^{\text{th}}$  effect of the  $i^{\text{th}}$  effect type;  $\hat{h}_i^2$  = the genomic heritability of the  $i^{\text{th}}$

480 effect type defined by Equation (52). For proving Equation 57,  $\hat{\sigma}_i^2$  and  $\hat{\sigma}_{ij}^2$  can be formulated  
 481 based on the method of mixed model equations (MME), i.e.,

$$482 \quad \hat{\sigma}_i^2 = \hat{\mathbf{t}}_i' \hat{\mathbf{t}}_i / [m_i - \text{tr}(\mathbf{C}^{ii})\lambda_i] = \sum_{j=1}^{m_i} \hat{\tau}_{ij}^2 / [m_i - \text{tr}(\mathbf{C}^{ii})\lambda_i] = \sum_{j=1}^{m_i} \hat{\sigma}_{ij}^2 \quad (42)$$

$$483 \quad \hat{\sigma}_{ij}^2 = \hat{\tau}_{ij}^2 / [m_i - \text{tr}(\mathbf{C}^{ii})\lambda_i] \quad (43)$$

484 where  $\mathbf{C}^{ii}$  is the submatrix in the inverse or generalized inverse of the coefficient matrix of the  
 485 MME corresponding to the  $i^{\text{th}}$  effect type,  $m_i$  = number of effects of the  $i^{\text{th}}$  effect type, and  
 486  $\lambda_i = \hat{\sigma}_e^2 / \hat{\sigma}_i^2$ . Dividing Equation 43 by  $\hat{\sigma}_y^2$  and multiplying by  $\hat{\sigma}_i^2 / \hat{\sigma}_i^2$  yield Equation 41, i.e.,

$$487 \quad \hat{h}_{ij}^2 = (\hat{\sigma}_{ij}^2 / \hat{\sigma}_y^2)(\hat{\sigma}_i^2 / \hat{\sigma}_i^2) = (\hat{\sigma}_{ij}^2 / \hat{\sigma}_i^2)(\hat{\sigma}_i^2 / \hat{\sigma}_y^2) = (\hat{\tau}_{ij}^2 / \sum_{i=1}^m \hat{\tau}_{ij}^2) \hat{h}_i^2 = (\hat{\tau}_{ij}^2 / \hat{\mathbf{t}}_i' \hat{\mathbf{t}}_i) \hat{h}_i^2 = (\hat{\sigma}_{ij}^2 / \hat{\sigma}_y^2).$$

488 It is readily seen that the sum of all heritability estimates of the  $i^{\text{th}}$  effect type is the genomic  
 489 heritability of the  $i^{\text{th}}$  effect type, i.e.,  $\sum_{i=1}^{m_i} \hat{h}_{ij}^2 = \hat{h}_i^2$ . Note that Equations 42 and 43 using MME are  
 490 only for proving Equation 41. The MME method is computationally prohibitive for estimating  
 491 genetic effects and their variances under the multifactorial model although the MME method yield  
 492 identical results as the CE method, which is computationally feasible for genomic estimation and  
 493 prediction under the multifactorial model.

#### 494 **Comparison between exact and approximate genomic epistasis relationship matrices**

495 We evaluated the differences between AGERM and EGERM in genomic heritability estimates and  
 496 prediction accuracies using a publicly available swine genomics data set that had 3534 animals  
 497 from a single PIC nucleus pig line with five anonymous traits and 52,842 genotyped and imputed  
 498 autosome SNPs after filtering by requiring minor allele frequency (MAF) > 0.001 and proportion  
 499 of missing SNP genotypes < 0.100 [35]. The EGERM used the method of Jiang and Reif [13] and



500 the AGERM methods were described in **Supplementary Text 1**. The heritability results showed  
501 that EGERM had slightly higher heritability estimates than AGERM except the A×A heritability  
502 of T3 where AGERM had slightly high estimate than EGERM (0.280 vs. 0.278, **Table 1**). From  
503 **Table 1**, effect type with nonzero heritability estimates was included in the prediction model for  
504 evaluating the observed prediction accuracy as the correlation between the GBLUP of genotypic  
505 values and the phenotypic values in each validation population and then averaged over all 10  
506 validation populations. The results showed that AGERM and EGERM had the same prediction  
507 accuracy for this swine sample (**Table 2**). A disadvantage of EGERM is the computing time for  
508 the construction of EGERM, about 9.51 times as much time for pairwise relationship matrices,  
509 8.29 as much time for third-order and 9.44 times as much time for fourth-order as required for  
510 AGERM (**Table 3**). However, computing time is not the deciding factor for choosing between the  
511 exact and approximate methods, because the multi-node approach that calculate each genomic  
512 relationship matrix in pieces and adds those pieces together can reduce the computing time to an  
513 acceptable level when multiple threads/cores are available and the two-step strategy can be used  
514 so that each genomic relationship is calculated only once for different traits and validation  
515 populations [31]. Prediction accuracy is the ultimate deciding factor for choosing between different  
516 methods. We reported results of comparing AGERM and EGERM using 60,671 SNPs and 22,022  
517 first-lactation Holstein cows with phenotypic observations of daughter pregnancy rate, showing  
518 that AGERM and EGERM had the same heritability estimates and prediction accuracy, but  
519 EGERM required 21 times as much computing time as required by AGERM, which required 1.32  
520 times as much time for the genomic additive relationship matrix [15]. The combined results of the  
521 swine and Holstein samples indicated that EGERM and AGERM had similar results and that the  
522 computing difficulty of EGERM over AGERM increased rapidly as the sample size increased.  
523 Given the computing difficulty of EGERM and the negligible differences between EGERM and

524 AGERM in prediction accuracy, AGERM should be favored for its mathematical simplicity and  
525 computing efficiency at least for samples with 50,000 SNPs or more.

### 526 **Numerical demonstration**

527 The methods of genomic epistasis relationship matrices based on the additive and dominance  
528 model matrices, GREML, GBLUP and reliability, and estimation of effect heritability are  
529 demonstrated using a R program (DEMO.R) and a small artificial sample for the convenience of  
530 reading the numerical results (**Supplementary Text S2 and R program**). Because of the artificial  
531 nature and the extremely small sample size, this numerical demonstration does not have any  
532 genetic and methodology implications and is for showing calculations of the methods only. This  
533 R program is an extension of the R demo program of GVCHAP that integrates SNP and haplotype  
534 effects and has a computing pipeline for producing the input haplotype data from the SNP data  
535 [31].

536

537

## 538 **CONCLUSION**

539 The multifactorial methods with SNP, haplotype and epistasis effects up to the third-order provide  
540 an approach to investigate the contributions of global low-order and local high-order epistasis  
541 effects to the phenotypic variance and the accuracy of genomic prediction. Genomic heritability of  
542 each effect type from GREML and prediction accuracy from validation studies using GBLUP can  
543 be used jointly to identify effect types contributing to the phenotypic variance and the accuracy of  
544 genomic prediction, and the GBLUP for the multifactorial model with selected effect type can be  
545 used for genomic evaluation. With many capabilities including the use of intra- and inter-  
546 chromosome separately, the multifactorial methods offer a significant methodology capability to  
547 investigate and utilize complex genetic mechanisms for genomic prediction and for understanding  
548 the complex genome-phenome relationships.

549

## **AUTHOR CONTRIBUTIONS**

YD conceived this study and derived the formulations. ZL contributed to formulations of the epistasis genomic relationships, implemented the epistasis methods in EPIHAP, validated and evaluated the methods. DP contributed to the data processing for methodology evaluation. YD and ZL prepared the manuscript.

## **FUNDING**

This research was supported by the National Institutes of Health's National Human Genome Research Institute, grant R01HG012425 as part of the NSF/NIH Enabling Discovery through GENomics (EDGE) Program; grant 2020-67015-31133 from the USDA National Institute of Food and Agriculture; and project MIN-16-124 of the Agricultural Experiment Station at the University of Minnesota. The funders had no role in study design, data collection and analysis, decision to publish, or preparation of the manuscript.

## **CONFLICT OF INTEREST STATEMENT**

The authors declare that the research was conducted in the absence of any commercial or financial relationships that could be construed as a potential conflict of interest.

## **ACKNOWLEDGMENTS**

The supercomputer of Minnesota Supercomputer Institute at the University of Minnesota and the Ceres and Atlas high performance computing system of USDA/ARS were used for the evaluation and testing of the methods and EPIHAP computing package. The use of the Ceres and Atlas computers by this research were supported by USDA-ARS projects 8042-31000-002-00-D and 8042-31000-001-00-D. The authors thank Paul VanRaden, Steven Schroeder and Ransom Baldwin for help with the use of the USDA-ARS computing facilities.

## **SUPPLEMENTARY MATERIAL**

**Text S1.** Quantitative Genetics Models and Genomic Epistasis Relationship Matrices

**Text S2.** Numerical Demonstration

**R program.** DEMO.R for Numerical Demonstration

**TABLE S1** | Notations of the quantitative genetics (QG) model, reparameterized and equivalent QG (RE-QG) model, and multifactorial (MF) model.

## REFERENCES

1. Cockerham CC. An extension of the concept of partitioning hereditary variance for analysis of covariances among relatives when epistasis is present. *Genetics*. 1954;39(6):859.
2. Kempthorne O. The correlation between relatives in a random mating population. *Proceedings of the Royal Society of London Series B-Biological Sciences*. 1954;143(910):103-13.
3. Henderson C. Best linear unbiased prediction of nonadditive genetic merits in noninbred populations. *Journal of Animal Science*. 1985;60(1):111-7.
4. Su G, Christensen OF, Ostersen T, Henryon M, Lund MS. Estimating additive and non-additive genetic variances and predicting genetic merits using genome-wide dense single nucleotide polymorphism markers. *PloS One*. 2012;7(9):e45293.
5. Muñoz PR, Resende MF, Gezan SA, Resende MDV, de los Campos G, Kirst M, et al. Unraveling additive from nonadditive effects using genomic relationship matrices. *Genetics*. 2014;198(4):1759-68.
6. Vitezica ZG, Legarra A, Toro MA, Varona L. Orthogonal estimates of variances for additive, dominance, and epistatic effects in populations. *Genetics*. 2017;206(3):1297-307.
7. VanRaden PM. Efficient methods to compute genomic predictions. *Journal of Dairy Science*. 2008;91(11):4414-23.
8. Hayes B, Goddard M. Genome-wide association and genomic selection in animal breeding. *Genome*. 2010;53(11):876-83.

9. Da Y, Wang C, Wang S, Hu G. Mixed model methods for genomic prediction and variance component estimation of additive and dominance effects using SNP markers. *PLoS One*. 2014;9(1):e87666.
10. Wang C, Da Y. Quantitative genetics model as the unifying model for defining genomic relationship and inbreeding coefficient. *PLoS One*. 2014;9(12):e114484.
11. Martini JW, Toledo FH, Crossa J. On the approximation of interaction effect models by Hadamard powers of the additive genomic relationship. *Theoretical population biology*. 2020;132:16-23.
12. Jiang Y, Reif JC. Modeling epistasis in genomic selection. *Genetics*. 2015;201(2):759-68.
13. Jiang Y, Reif JC. Efficient algorithms for calculating epistatic genomic relationship matrices. *Genetics*. 2020;216(3):651-69.
14. Martini JW, Wimmer V, Erbe M, Simianer H. Epistasis and covariance: how gene interaction translates into genomic relationship. *Theoretical and Applied Genetics*. 2016;129(5):963-76.
15. Liang Z, Prakapenka D, Da Y. Comparison of two methods of genomic epistasis relationship matrices using daughter pregnancy rate in U.S. Holstein cattle. Abstract 2466V, page 409 of ADSA2022 Abstracts. [https://www.adsa.org/Portals/0/SiteContent/Docs/Meetings/2022ADSA/Abstracts\\_BOOK\\_2022.pdf?v=20220613](https://www.adsa.org/Portals/0/SiteContent/Docs/Meetings/2022ADSA/Abstracts_BOOK_2022.pdf?v=20220613). 2022.
16. Liang Z, Prakapenka D, Da Y. EPIHAP: a computing tool for genomic estimation and prediction using global epistasis effects and haplotype effects. Abstract P167, page 223 of ADSA2021 Abstracts, ADSA 2021 Virtual Annual Meeting. [https://www.adsa.org/Portals/0/SiteContent/Docs/Meetings/2021ADSA/ADSA2021\\_Abstracts.pdf](https://www.adsa.org/Portals/0/SiteContent/Docs/Meetings/2021ADSA/ADSA2021_Abstracts.pdf). 2021.

17. Phillips PC. Epistasis—the essential role of gene interactions in the structure and evolution of genetic systems. *Nature Reviews Genetics*. 2008;9(11):855-67.
18. Carlborg Ö, Haley CS. Epistasis: too often neglected in complex trait studies? *Nature Reviews Genetics*. 2004;5(8):618-25.
19. Ritchie MD, Van Steen K. The search for gene-gene interactions in genome-wide association studies: challenges in abundance of methods, practical considerations, and biological interpretation. *Annals of translational medicine*. 2018;6(8):157.
20. Mackay TF. Epistasis and quantitative traits: using model organisms to study gene-gene interactions. *Nature Reviews Genetics*. 2014;15(1):22-33.
21. Cordell HJ. Epistasis: what it means, what it doesn't mean, and statistical methods to detect it in humans. *Human molecular genetics*. 2002;11(20):2463-8.
22. Segre D, DeLuna A, Church GM, Kishony R. Modular epistasis in yeast metabolism. *Nature genetics*. 2005;37(1):77-83.
23. Liang Z, Tan C, Prakapenka D, Ma L, Da Y. Haplotype analysis of genomic prediction using structural and functional genomic information for seven human phenotypes. *Frontiers in Genetics*. 2020;11(1461):588907. doi: 10.3389/fgene.2020.588907.
24. Bian C, Prakapenka D, Tan C, Yang R, Zhu D, Guo X, et al. Haplotype genomic prediction of phenotypic values based on chromosome distance and gene boundaries using low-coverage sequencing in Duroc pigs. *Genetics Selection Evolution*. 2021;53(1):1-19.
25. Sallam AH, Conley E, Prakapenka D, Da Y, Anderson JA. Improving prediction accuracy using multi-allelic haplotype prediction and training population optimization in wheat. *G3: Genes, Genomes, Genetics*. 2020;10(7):2265-73.



26. Prakapenka D, Liang Z, Jiang J, Ma L, Da Y. A Large-scale genome-wide association study of epistasis effects of production traits and daughter pregnancy rate in US Holstein cattle. *Genes*. 2021;12(7):1089.
27. Da Y. Multi-allelic haplotype model based on genetic partition for genomic prediction and variance component estimation using SNP markers. *BMC Genetics*. 2015;16(1):144.
28. Da Y, Tan C, Parakapenka D. Joint SNP-haplotype analysis for genomic selection based on the invariance property of GBLUP and GREML to duplicate SNPs. *Journal of Animal Science*. 2016;94(Suppl\_5):161-2.
29. Tan C, Wu Z, Ren J, Huang Z, Liu D, He X, et al. Genome-wide association study and accuracy of genomic prediction for teat number in Duroc pigs using genotyping-by-sequencing. *Genetics Selection Evolution*. 2017;49(1):35.
30. Wang C, Prakapenka D, Wang S, Pulugurta S, Runesha HB, Da Y. GVCBLUP: a computer package for genomic prediction and variance component estimation of additive and dominance effects. *BMC Bioinformatics*. 2014;15(1):270.
31. Prakapenka D, Wang C, Liang Z, Bian C, Tan C, Da Y. GVCHAP: a computing pipeline for genomic prediction and variance component estimation using haplotypes and SNP markers. *Frontiers in Genetics*. 2020;11:282. doi: 10.3389/fgene.2020.00282.
32. Henderson C. Best linear unbiased prediction of breeding values not in the model for records. *Journal of Dairy Science*. 1977;60(5):783-7.
33. Johnson D, Thompson R. Restricted maximum likelihood estimation of variance components for univariate animal models using sparse matrix techniques and average information. *Journal of dairy science*. 1995;78(2):449-56.

34. Lee SH, van der Werf JH. An efficient variance component approach implementing an average information REML suitable for combined LD and linkage mapping with a general complex pedigree. *Genetics Selection Evolution*. 2006;38(1):1-19.
35. Cleveland MA, Hickey JM, Forni S. A common dataset for genomic analysis of livestock populations. *G3: Genes| Genomes| Genetics*. 2012;2(4):429-35.

**Table 1 | Genomic heritability estimates of additive, dominance and epistasis effects up to the third-order for five traits in a swine population**

|                    | Trait                                                       |       |       |       |       |
|--------------------|-------------------------------------------------------------|-------|-------|-------|-------|
|                    | T1                                                          | T2    | T3    | T4    | T5    |
| Effect             | Exact genomic epistasis relationship matrices (EGERM)       |       |       |       |       |
| A                  | 0.023                                                       | 0.217 | 0.131 | 0.336 | 0.366 |
| D                  | 0.000                                                       | 0.013 | 0.000 | 0.000 | 0.052 |
| A×A                | 0.046                                                       | 0.186 | 0.278 | 0.017 | 0.054 |
| A×D                | 0.000                                                       | 0.000 | 0.091 | 0.000 | 0.000 |
| D×D                | 0.000                                                       | 0.000 | 0.091 | 0.000 | 0.000 |
| A×A×A              | 0.000                                                       | 0.000 | 0.000 | 0.000 | 0.000 |
| A×A×D              | 0.000                                                       | 0.000 | 0.079 | 0.000 | 0.000 |
| A×D×D              | 0.000                                                       | 0.000 | 0.102 | 0.000 | 0.000 |
| D×D×D              | 0.000                                                       | 0.000 | 0.117 | 0.000 | 0.000 |
| Total heritability | 0.069                                                       | 0.416 | 0.889 | 0.354 | 0.471 |
| Effect             | Approximate genomic epistasis relationship matrices (AGERM) |       |       |       |       |
| A                  | 0.022                                                       | 0.215 | 0.139 | 0.329 | 0.360 |
| D                  | 0.000                                                       | 0.013 | 0.000 | 0.000 | 0.051 |
| A×A                | 0.043                                                       | 0.176 | 0.280 | 0.016 | 0.050 |
| A×D                | 0.000                                                       | 0.000 | 0.091 | 0.000 | 0.000 |
| D×D                | 0.000                                                       | 0.000 | 0.090 | 0.000 | 0.000 |
| A×A×A              | 0.000                                                       | 0.000 | 0.000 | 0.000 | 0.000 |
| A×A×D              | 0.000                                                       | 0.000 | 0.075 | 0.000 | 0.000 |
| A×D×D              | 0.000                                                       | 0.000 | 0.095 | 0.000 | 0.000 |
| D×D×D              | 0.000                                                       | 0.000 | 0.109 | 0.000 | 0.000 |
| Total heritability | 0.065                                                       | 0.404 | 0.879 | 0.346 | 0.461 |

**Table 2 | Observed prediction accuracy of epistasis models relative to the additive model for five traits in a swine population**

|                                  | Trait  |        |                            |       |        |
|----------------------------------|--------|--------|----------------------------|-------|--------|
|                                  | T1     | T2     | T3                         | T4    | T5     |
| Prediction accuracy of SNP model |        |        |                            |       |        |
| A                                | 0.066  | 0.495  | 0.326                      | 0.468 | 0.493  |
| A+D                              | 0.056  | 0.495  | 0.326                      | 0.468 | 0.496  |
| Epistasis model                  | A+AA   | A+D+AA | A+AA+AD+DD+<br>AAD+ADD+DDD | A+AA  | A+D+AA |
| EGERM                            |        |        |                            |       |        |
| Prediction accuracy              | 0.063  | 0.498  | 0.336                      | 0.468 | 0.497  |
| Accuracy increase (%)            | -4.545 | 0.606  | 3.067                      | 0.000 | 0.202  |
| AGERM                            |        |        |                            |       |        |
| Prediction accuracy              | 0.063  | 0.498  | 0.336                      | 0.468 | 0.497  |
| Accuracy increase (%)            | -4.545 | 0.606  | 3.067                      | 0.000 | 0.202  |

‘Prediction accuracy’ is the observed prediction accuracy calculated as the correlation between the GBLUP of genotypic values and the phenotypic values in each validation population and then averaged over all 10 validation populations. ‘Accuracy increase’ is percentage increase of the observed prediction accuracy of the epistasis model over the observed prediction accuracy of the best SNP model, which was the additive model (A) for T1-T4 and the A+D model for T5. A = additive effects, D = dominance effects, AA = A×A effects, AD = A×D effects, DD = D×D effects, AAA = A×A×A effects, AAD = A×A×D effects, ADD = A×D×D dominance effects, DDD = D×D×D dominance effects.

**Table 3 | Computing time (in seconds) for the construction of exact and approximate genomic epistasis relationship matrices for a swine population with 3534 pigs and 52,843 SNPs using 20 threads of the Mangi supercomputer of the Minnesota Supercomputer Institute at the University of Minnesota.**

| Genomic epistasis relationship matrices | Pairwise | Third order | Fourth order |
|-----------------------------------------|----------|-------------|--------------|
| EGERM                                   | 666      | 796         | 1256         |
| AGERM                                   | 70       | 96          | 133          |
| EGERM/AGERM                             | 9.51     | 8.29        | 9.44         |
